# Supplementary material
Source: Springer Nature journal article supplement (https://www.springermedizin.de/resource/supplementary/12875_2011_632_MOESM2_ESM.pdf/9434828)
Supplement: MOESM2 [file 9434828]

- **Primary Health Care Activity Monitor for Europe (PHAMEU)**; a DG-Sanco funded project, lead by NIVEL, that collected information on the structure of primary care at country level in 2009/10;
- The 1993 EU funded **study on Profile of general practice in Europe**, lead by NIVEL. Elements of this study are part of a primary care evaluation tool, implemented by NIVEL for WHO in countries in transition (e.g. Russian Federation and Turkey);
- **OECD Health Care Quality Indicators (HCQI)** Project has defined a number of quality indicators including indicators for avoidable hospitalisations (Marshall et al., 2006);
- **Eurostat and OECD System of Health Accounts** that aims at harmonizing information on health care costs, both in OECD countries and EU member states
- **OECD Health Equity Project** that analysed a large number of national health interview surveys to estimate equity.
